# Supplementary material for: Creating Mutual Gains to Leverage a Racially Diverse Workforce: The Effects of Firm-Level Racial Diversity on Financial and Workforce Outcomes Under the Use of Broad-Based Stock Options
Source: Atypon-hosted journal article supplement (doi:10.1287/orsc.2020.1360), 2020-10-14

## Appendix A. Firm Demographics of the Initial and Final Samples

| Industry (%)                      | 2006    |           | 2007      |           | 2008      |           | 2009      |           | 2010     |           | Total     |           |           |
|-----------------------------------|---------|-----------|-----------|-----------|-----------|-----------|-----------|-----------|----------|-----------|-----------|-----------|-----------|
|                                   | Initial | Final     | Initial   | Final     | Initial   | Final     | Initial   | Final     | Initial  | Final     | Initial   | Final     |           |
| Advertising/marketing             | 0.50    | 1.19      | 0.52      | 1.30      | 0.57      | 0.00      | 0.00      | 0.00      | 1.23     | 1.72      | 0.56      | 0.85      |           |
| Aerospace                         | 2.00    | 2.38      | 1.03      | 1.30      | 1.14      | 2.78      | 0.00      | 0.00      | 0.00     | 0.00      | 0.90      | 1.41      |           |
| Agriculture                       | 0.50    | 1.19      | 0.52      | 1.30      | 1.14      | 1.39      | 0.63      | 1.59      | 1.23     | 1.72      | 0.78      | 1.41      |           |
| Biotechnology/<br>pharmaceuticals | 4.00    | 8.33      | 3.61      | 6.49      | 4.55      | 4.17      | 3.13      | 3.17      | 3.07     | 1.72      | 3.70      | 5.08      |           |
| Construction/real estate          | 5.50    | 8.33      | 7.22      | 7.79      | 7.95      | 8.33      | 5.00      | 3.17      | 6.75     | 3.45      | 6.49      | 6.50      |           |
| Education and training            | 1.00    | 2.38      | 1.55      | 1.30      | 1.14      | 0.00      | 0.63      | 0.00      | 0.61     | 0.00      | 1.01      | 0.85      |           |
| Electronics                       | 0.50    | 0.00      | 1.03      | 2.60      | 0.57      | 1.39      | 1.25      | 3.17      | 1.23     | 1.72      | 0.90      | 1.69      |           |
| Financial<br>services/insurance   | 17.00   | 13.10     | 14.95     | 11.69     | 12.50     | 11.11     | 11.25     | 9.52      | 14.11    | 12.07     | 14.11     | 11.58     |           |
| Health care                       | 3.00    | 1.19      | 2.06      | 1.30      | 3.98      | 2.78      | 5.00      | 0.00      | 4.91     | 1.72      | 3.70      | 1.41      |           |
| Hospitality                       | 8.00    | 5.95      | 7.73      | 6.49      | 7.95      | 6.94      | 5.63      | 4.76      | 5.52     | 3.45      | 7.05      | 5.65      |           |
| Industrial services               | 0.50    | 1.19      | 0.00      | 0.00      | 0.57      | 0.00      | 0.63      | 1.59      | 1.23     | 3.45      | 0.56      | 1.13      |           |
| Information technology            | 8.00    | 10.71     | 9.79      | 10.39     | 11.93     | 12.50     | 11.25     | 17.46     | 9.82     | 13.79     | 10.08     | 12.71     |           |
| Manufacturing/production          | 15.00   | 16.67     | 18.56     | 27.27     | 15.91     | 25.00     | 20.63     | 28.57     | 18.40    | 29.31     | 17.58     | 24.86     |           |
| Media                             | 2.50    | 4.76      | 2.06      | 3.90      | 1.70      | 4.17      | 2.50      | 4.76      | 1.84     | 3.45      | 2.13      | 4.24      |           |
| Mining and quarrying              | 0.50    | 1.19      | 0.52      | 1.30      | 0.00      | 0.00      | 0.00      | 0.00      | 0.00     | 0.00      | 0.22      | 0.56      |           |
| Professional services             | 11.50   | 2.38      | 12.89     | 3.90      | 11.93     | 2.78      | 14.38     | 4.76      | 12.27    | 5.17      | 12.54     | 3.67      |           |
| Retail                            | 16.00   | 14.29     | 12.37     | 9.09      | 12.50     | 12.50     | 14.38     | 12.70     | 13.50    | 12.07     | 13.77     | 12.15     |           |
| Telecommunications                | 2.00    | 2.38      | 2.06      | 1.30      | 2.27      | 1.39      | 1.88      | 1.59      | 3.07     | 3.45      | 2.24      | 1.98      |           |
| Transportation                    | 1.50    | 2.38      | 1.55      | 1.30      | 1.70      | 2.78      | 1.88      | 3.17      | 1.23     | 1.72      | 1.57      | 2.26      |           |
| Total (%)                         | 100     | 100       | 100       | 100       | 100       | 100       | 100       | 100       | 100      | 100       | 100       | 100       |           |
| Firm age                          | Mean    | 71.05     | 66.11     | 73.29     | 71.75     | 64.65     | 60.07     | 67.57     | 63.78    | 69.32     | 70.52     | 69.34     | 64.42     |
|                                   | SD      | 40.00     | 40.47     | 43.00     | 47.00     | 37.30     | 38.02     | 42.69     | 49.56    | 43.44     | 50.11     | 41.31     | 44.80     |
| Total employees                   | Mean    | 15,954.05 | 19,703.58 | 15,478.12 | 20,474.92 | 14,884.77 | 24,127.07 | 14,987.94 | 21,231.9 | 14,668.18 | 20,482.28 | 15,230.83 | 21,170.62 |
|                                   | SD      | 27,257.03 | 36,142.49 | 27,223.83 | 36,092.30 | 30,661.13 | 43,893.97 | 31,800.64 | 44,588.8 | 28,542.61 | 40,513.90 | 28,968.43 | 39,897.77 |
| Racial diversity                  | Mean    | 0.42      | 0.44      | 0.43      | 0.45      | 0.44      | 0.47      | 0.44      | 0.44     | 0.45      | 0.45      | 0.44      | 0.45      |
|                                   | SD      | 0.15      | 0.14      | 0.16      | 0.13      | 0.18      | 0.17      | 0.16      | 0.14     | 0.16      | 0.14      | 0.16      | 0.14      |

## Appendix B. First-Stage Regression Results

|                                     | 2SLS model predicting operating ROA |                                        | 2SLS model predicting voluntary turnover |                                        | 2SLS model predicting individual commitment |                                        |
|-------------------------------------|-------------------------------------|----------------------------------------|------------------------------------------|----------------------------------------|---------------------------------------------|----------------------------------------|
|                                     | First-stage DV: BSO                 | First-stage DV: racial diversity × BSO | First-stage DV: BSO                      | First-stage DV: racial diversity × BSO | First-stage DV: BSO                         | First-stage DV: racial diversity × BSO |
| Constant                            | .17*                                | -.01                                   | .16*                                     | -.01                                   | .15*                                        | -.02*                                  |
| Operating ROA ( <i>t</i> )          | .20                                 | .05                                    | .18                                      | .05                                    | .14*                                        | .05*                                   |
| Voluntary turnover ( <i>t</i> )     | -.01                                | -.01                                   | -.01                                     | -.01                                   | .04*                                        | -.01*                                  |
| Organization age                    | -.09                                | .01                                    | -.10*                                    | .01                                    | -.12*                                       | .01*                                   |
| Organization size                   | .10*                                | .00                                    | .10*                                     | .00                                    | .09*                                        | .003*                                  |
| “100 Best” dummy                    | .05                                 | -.01                                   | .07                                      | .00                                    | .00                                         | -.01*                                  |
| Annual pay level                    | .00                                 | -.02*                                  | .00                                      | -.02*                                  | .06*                                        | -.02*                                  |
| Training                            | -.02                                | .00                                    | -.02                                     | .00                                    | -.01*                                       | .002*                                  |
| Benefit                             | -.12                                | .02                                    | -.14                                     | .02                                    | .09*                                        | .01*                                   |
| Empowering climate                  | .14                                 | .01                                    | .19                                      | -.01                                   | -.02                                        | -.01*                                  |
| Equal treatment                     | .26                                 | .02                                    | .22                                      | .02                                    | -.03                                        | .07*                                   |
| Racial diversity                    | -.31                                | .29*                                   | -.34                                     | .31*                                   | -.34*                                       | .18*                                   |
| Year dummies                        | Included                            | Included                               | Included                                 | Included                               | Included                                    | Included                               |
| Industry dummies                    | Included                            | Included                               | Included                                 | Included                               | Included                                    | Included                               |
| Individual-level controls           | n/a                                 | n/a                                    | n/a                                      | n/a                                    | Included                                    | Included                               |
| Location dummy 1                    | .32*                                | .01                                    | .31*                                     | .01                                    | .49*                                        | .02*                                   |
| Location dummy 2                    | .84*                                | .03                                    | .85*                                     | .02                                    | .79*                                        | .04*                                   |
| Location dummy 3                    | -.21*                               | .00                                    | -.24*                                    | .00                                    | .22*                                        | -.01                                   |
| Location dummy 4                    | .28*                                | -.03                                   | .27*                                     | -.03*                                  | .26*                                        | -.01*                                  |
| Location dummy 5                    | 2.17*                               | .02                                    | 2.34*                                    | -.04                                   | -.21                                        | .09*                                   |
| Location dummy 6                    | -.10                                | -.01                                   | -.11                                     | -.02                                   | -.16*                                       | .00                                    |
| Location dummy 7                    | -.36*                               | -.02                                   | -.37*                                    | -.02*                                  | -.32*                                       | -.02*                                  |
| Racial diversity × location dummy 1 | .43                                 | .33*                                   | .61                                      | .35*                                   | .42*                                        | .28*                                   |
| Racial diversity × location dummy 2 | -.53                                | .59*                                   | -.78                                     | .60*                                   | .00                                         | .66*                                   |
| Racial diversity × location dummy 3 | 4.94*                               | .54*                                   | 5.15*                                    | .46*                                   | .37*                                        | .81*                                   |
| Racial diversity × location dummy 4 | -.56                                | .57*                                   | -.34                                     | .53*                                   | -1.16*                                      | 1.01*                                  |
| Racial diversity × location dummy 5 | -8.51                               | .86                                    | -9.51                                    | 1.15                                   | 6.18*                                       | .52*                                   |
| Racial diversity × location dummy 6 | 1.82*                               | -.47*                                  | 1.90*                                    | -.48*                                  | .29*                                        | -.18*                                  |
| Racial diversity × location dummy 7 | -.86                                | -.32*                                  | -.92                                     | -.34*                                  | -.56*                                       | -.32*                                  |

|                 |        |         |        |         |         |         |
|-----------------|--------|---------|--------|---------|---------|---------|
| Wald chi-square | 3,860* | 13,045* | 5,899* | 17,600* | 17,208* | 37,393* |
|-----------------|--------|---------|--------|---------|---------|---------|

*Note.* *BSO* refers to broad-based stock options; *ROA* refers to return on assets; *2SLS* refers to two-stage least squares; *DV* refers to dependent variable. Location dummies 1 to 7 indicate California, Nevada, Washington, Tennessee, North Carolina, Ohio, and Minnesota, respectively. Year and industry dummies and individual-level control variables (for the model predicting individual affective commitment) were included but are not shown because of a general lack of significance. \*  $p < .05$ .

**Appendix C. Mean Comparison between the Adopters and Non-Adopters of Broad-Based Stock Options in the Matched Sample ( $N = 194$ )**

|                                 | Mean     |              | <i>t</i> -test (sig) | <i>p</i> -value |
|---------------------------------|----------|--------------|----------------------|-----------------|
|                                 | Adopters | Non-Adopters |                      |                 |
| Operating ROA ( <i>t</i> )      | .06      | .06          | -.01                 | .99             |
| Voluntary turnover ( <i>t</i> ) | -2.34    | -2.26        | -.77                 | .44             |
| Organization age                | 3.75     | 3.74         | .12                  | .91             |
| Organization size               | 9.20     | 9.13         | .35                  | .73             |
| “100 Best” dummy                | .59      | .54          | .72                  | .47             |
| Annual pay level                | 11.34    | 11.37        | -.61                 | .54             |
| Training                        | .57      | .47          | .99                  | .33             |
| Benefit                         | .54      | .56          | -.41                 | .68             |
| Empowering climate              | 4.15     | 4.12         | 1.10                 | .27             |
| Equal treatment                 | 4.61     | 4.60         | .11                  | .91             |
| Industry dummies                |          |              |                      |                 |
| Advertising/marketing           | .01      | .01          | .00                  | 1.00            |
| Aerospace                       | .02      | .00          | 1.42                 | .16             |
| Agriculture                     | .01      | .00          | 1.00                 | .32             |
| Biotechnology/ pharmaceuticals  | .06      | .05          | .31                  | .76             |
| Construction/real estate        | .04      | .08          | -1.19                | .24             |
| Education and training          | .00      | .00          | n/a                  | n/a             |
| Electronics                     | .02      | .04          | -.83                 | .41             |
| Financial services/insurance    | .09      | .05          | 1.11                 | .27             |
| Health care                     | .03      | .01          | 1.01                 | .32             |
| Hospitality                     | .08      | .07          | .27                  | .79             |
| Industrial services             | .00      | .03          | -1.75                | .08             |
| Information technology          | .16      | .16          | .00                  | 1.00            |
| Manufacturing/production        | .18      | .22          | -0.72                | .47             |
| Media                           | .02      | .05          | -1.15                | .25             |
| Mining and quarrying            | .01      | .00          | 1.00                 | .32             |
| Professional services           | .00      | .07          | -2.73*               | .01             |
| Retail                          | .16      | .13          | .60                  | .55             |
| Telecommunications              | .06      | .00          | 2.52*                | .01             |
| Transportation                  | .03      | .01          | 1.01                 | .32             |

Note. \*  $p < .05$ .

### Appendix D. Supplementary Analysis Results Using the Workplace and Employee Survey Data

**TABLE D1.**

**Descriptive Statistics and Bivariate Correlations in the Supplementary Study**

| Variables                         | Mean  | SD    | 1    | 2    | 3    | 4    | 5    | 6    | 7    | 8    |
|-----------------------------------|-------|-------|------|------|------|------|------|------|------|------|
| 1. Organization age               | 13.53 | 14.45 |      |      |      |      |      |      |      |      |
| 2. Organization size              | 1.87  | 1.12  | .15* |      |      |      |      |      |      |      |
| 3. Base pay level                 | 10.06 | .69   | .04* | .14* |      |      |      |      |      |      |
| 4. Training                       | .09   | .14   | .09* | .47* | .15* |      |      |      |      |      |
| 5. Benefit                        | .18   | .23   | .11* | .47* | .37* | .44* |      |      |      |      |
| 6. Racial diversity               | .11   | .19   | -.00 | .26* | .09* | .08* | .10* |      |      |      |
| 7. Employee stock plans           | .06   | .24   | .01  | .10* | .05* | .15* | .15* | .01  |      |      |
| 8. Labor productivity ( $t$ )     | 11.59 | .92   | .08* | -.01 | .54* | .08* | .28* | .04* | .04* |      |
| 9. Labor productivity ( $t + 1$ ) | 11.63 | .91   | .06* | .03* | .50* | .08* | .27* | .06* | .04* | .88* |

Note.  $N = 17,630$  (company-year observations);  $N = 7,370$  (companies). \*  $p < .05$ .

**TABLE D2.**

**Random-Effects Specification Results in the Supplementary Study**

| DV = Labor productivity ( $t + 1$ )            | Full sample<br>( $N = 17,630$ ) |         |         | Matched sample<br>( $N = 1,710$ ) |         |         |
|------------------------------------------------|---------------------------------|---------|---------|-----------------------------------|---------|---------|
|                                                | Model 1                         | Model 2 | Model 3 | Model 4                           | Model 5 | Model 6 |
| Constant                                       | 4.70*                           | 4.70*   | 4.70*   | 3.04*                             | 2.93*   | 2.93*   |
| Labor productivity ( $t$ )                     | .57*                            | .57*    | .57*    | .60*                              | .61*    | .61*    |
| Voluntary turnover ( $t$ )                     | -.01                            | -.01    | -.01    | -.17*                             | -.17*   | -.19*   |
| Organization age                               | -.00                            | -.00    | -.00    | -.00                              | .00     | -.00    |
| Organization size                              | .05*                            | .05*    | .05*    | -.01                              | -.00    | -.01    |
| Base pay level                                 | .01                             | .02     | .02     | .17*                              | .17*    | .17*    |
| Training                                       | .09*                            | .09*    | .09*    | -.03                              | -.02    | -.05    |
| Benefit                                        | .14*                            | .14*    | .14*    | .28*                              | .27*    | .27*    |
| Racial diversity                               |                                 | .05*    | .04*    |                                   | .02     | -.13*   |
| Employee stock plans                           |                                 | .01     | -.02    |                                   | .07     | .00     |
| Racial diversity $\times$ Employee stock plans |                                 |         | .23*    |                                   |         | .42*    |
| -2 LL                                          | 12,775                          | 12,767  | 12,757  | 330                               | 325     | 305     |
| AIC                                            | 12,827                          | 12,823  | 12,815  | 382                               | 381     | 363     |
| $\Delta$ AIC                                   |                                 | 4.43    | 8.00    |                                   | .11     | 18.62   |

Note. Because the Workplace and Employee Survey dataset did not provide any information about the companies' geographic location or alternative variables that could be considered exogenous, we were unable to use the instrumental variable method as we did with the Great Place to Work dataset in the main study. Year and industry dummies were included but are not shown to save space. \*  $p < .05$ .

**FIGURE D1.**

**Interactive Effects of Racial Diversity and Employee Stock Plans on Labor Productivity in the Supplementary Study**

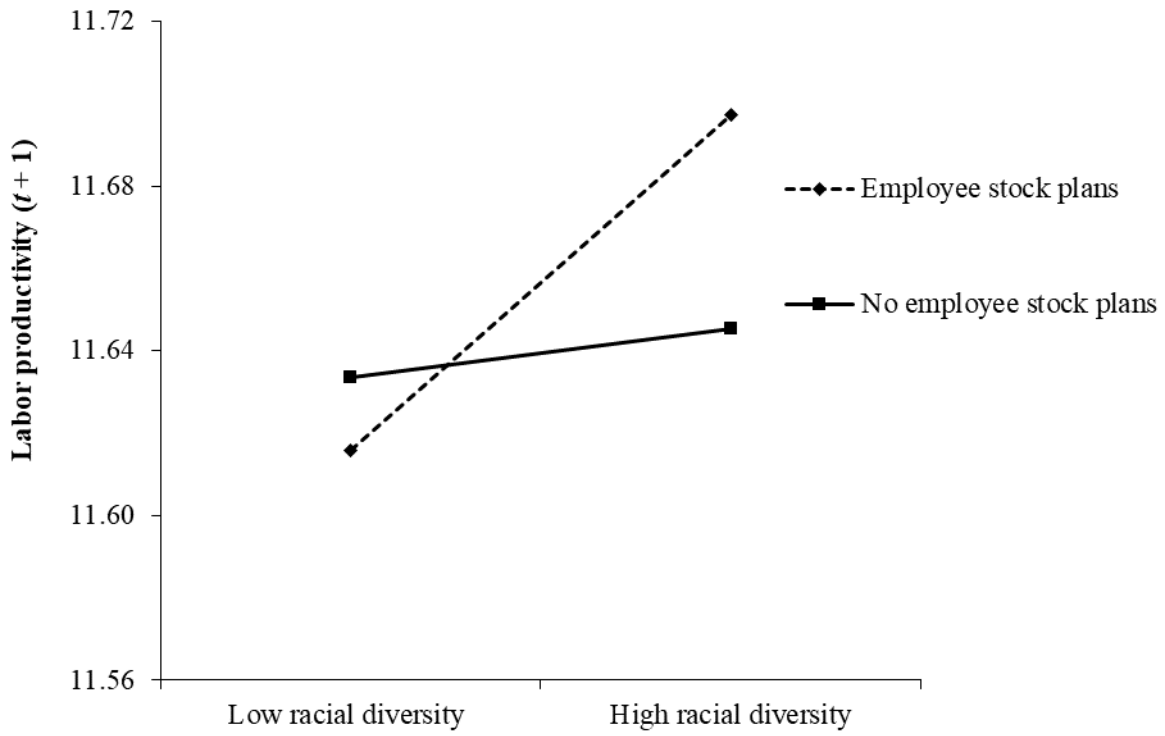

Supplement: orsc.2020.1360.sm1.pdf [file orsc.2020.1360.sm1.pdf]
